# Supplementary material for: Facile fabrication of an organic semiconductor/graphene microribbon heterojunction by self-assembly
Source: Royal Society of Chemistry journal article supplement (doi:10.1039/c6ra09053b), 2016-01-01
Supplement: c6ra09053b1.pdf [file c6ra09053b1.pdf]

# Facile fabrication of organic semiconductor/graphene microribbon heterojunction by self-assembly

Jianfeng Zhang, Xinjun Xu\*, Chuang Yao and Lidong Li\*

*School of Materials Science and Engineering, University of Science and Technology*

*Beijing, Beijing 100083, P. R. China*

## Materials and methods

### *Materials*

3,7-bis(5-(2-ethylhexyl)thiophen-2-yl)dithieno[2,3-b:2',3'-e]pyrazine (BEHT-DTP) was synthesized by ourselves<sup>1</sup>. The graphene water dispersion was purchased from Xiamen Knano Graphene Technology, Ltd.. The concentration of the graphene dispersion is 1mg/mL, the graphene sheets is about 0.1-5  $\mu\text{m}$  in size and less than 1 nm in thickness (< 3 layers), and the oxygen content is less than 0.5%. The solvents used in the experiments were used without further purification. Deionized water was used in all experiments.

### *Characterization*

Ultraviolet-visible absorption spectra were collected on a Hitachi U-3900H spectrophotometer. The fluorescence spectra were recorded by a Hitachi F7000 spectrophotometer. Raman spectra were obtained with a laser scanning Raman microscope (Raman-11, Nanophoton), excited by a laser of 532 nm, the Si peak at  $520\text{ cm}^{-1}$  was used as a reference for wavenumber calibration. The optical microscopy

images were obtained by a PSM-1000 microscope. The TEM images and SAED were obtained by a JEM-2010 TEM with an accelerating voltage of 120 kV. AFM measurement was performed on a Nanoscope IIIa atomic force microscope in tapping mode. The electricity characteristics were carried out by Keithley 4200-SCS semiconductor characterization system connected to a Semishare SE-4 probe station in ambient environment. The simulated white light was provided by a tungsten light ( $\sim 79.4 \text{ mW/cm}^2$ ) guided by a quartz fiber. The monochromatic light for external quantum efficiency (EQE) spectra measurement was provided by a Crowntech QEM24-S monochromator guided by a quartz fiber.

#### *Preparation of BEHT-DTP microribbon*

Before the drop-casting of BEHT-DTP/THF solution, the Si/SiO<sub>2</sub> substrates (14.8×14.8 mm) was cleaned by detergent and then sequentially ultrasonicated in deionized water and alcohol, followed by ultraviolet-ozone treatment for 15 min. Then, 50  $\mu\text{L}$  of BEHT-DTP/THF was drop-casted onto a clean Si/SiO<sub>2</sub> substrate held in a beaker, and 1 mL THF was added into the beaker as “antisolvent” to slow down the evaporation speed of the solvent, and the antisolvent was kept from the Si/SiO<sub>2</sub> substrate. At last, the beaker was sealed by a parafilm with a small hole on it. After about 6 hours, with the evaporation of solvent, the self-assembly of microribbon was completed. For the preparation of BEHT-DTP microneedle, the “antisolvent” was removed and the beaker was kept open to allow the solvent evaporate quickly. For the TEM characterization, a copper grid was placed on the substrate and the microribbon

was self-assembly on it, then a copper grid with microribbon was obtained.

#### *Preparation of BEHT-DTP/graphene heterostructure microribbon*

The graphene dispersion was treated by ultrasonic for 10 min before using. Then 0.6 mL of the graphene water dispersion was dropped onto the substrate with BEHT-DTP microribbon (the substrate turned hydrophobic when covered by BEHT-DTP microribbon) to cover the entire substrate. Driven by  $\pi$ - $\pi$  interaction, the graphene was adsorbed onto the surface of BEHT-DTP microribbon. After 10 min, the excess free graphene can be removed by rinsing the substrate with deionized water, followed by drying under a gentle stream of nitrogen.

#### *Fabrication of photoconductive devices*

The self-assembly process was the same as the above, except that the substrate was replaced by the Si/SiO<sub>2</sub> substrate with photolithography-defined gold electrodes array (50 nm thick) with a channel length of 5  $\mu$ m. The substrates were cleaned according to the same process of fabrication of BEHT-DTP microribbon.

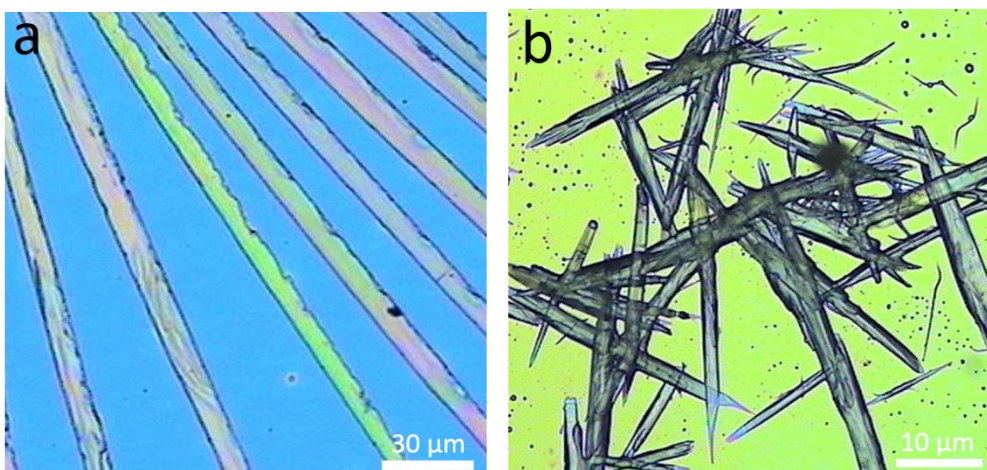

**Fig. S1** The BEHT-DTP (a) microribbon fabricated in low evaporation rate (with antisolvent) and (b) microneedle fabricated in high evaporation rate (without antisolvent).

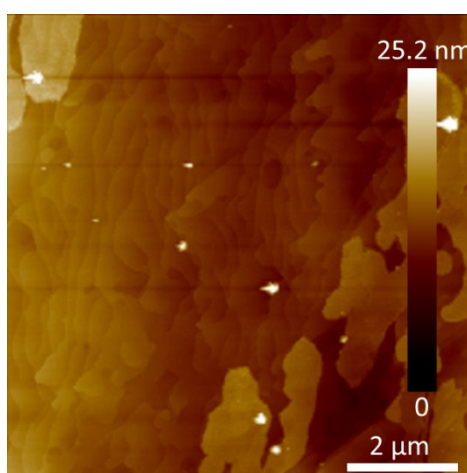

**Fig. S2** The low magnification of the surface of the graphene coated BEHT-DTP microribbon.

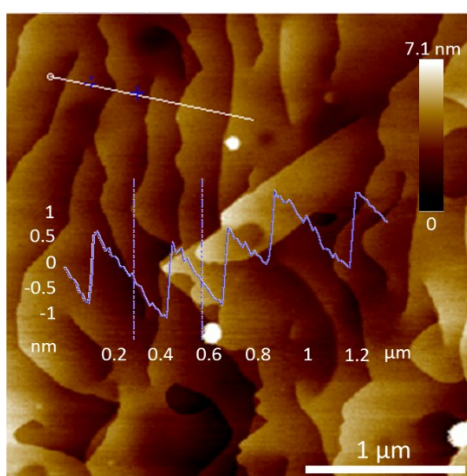

**Fig. S3** The cross section profile along the white line at the surface of the assembled graphene sheets on the BEHT-DTP/graphene microribbon.

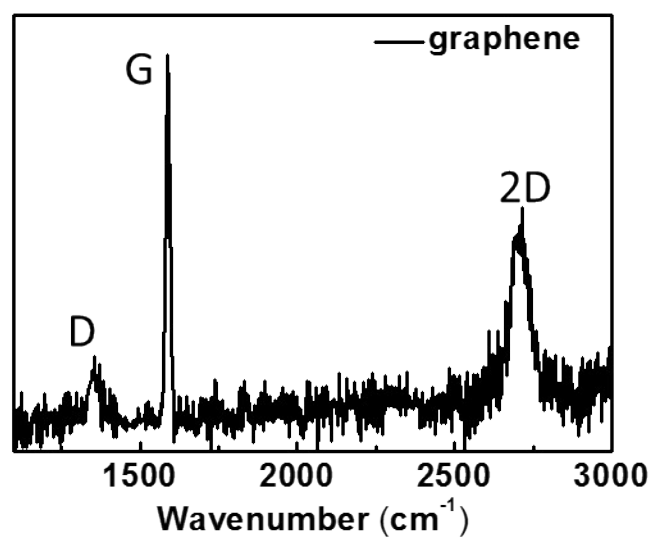

**Fig.S4** The full Raman spectrum of the graphene with D, G and 2D bands.

#### References

1. J. Zhang, J. Wang, X. Xu, S. Chen, Q. Zhang, C. Yao, X. Zhuang, A. Pan and L. Li, *J Mater Chem C*, 2015, **3**, 5933-5939.
